## Correction

**Correction: *BRAF*<sup>V600E</sup>-mutated ovarian serous borderline tumors are at relatively low risk for progression to serous carcinoma****M. Herman Chui<sup>1</sup>, Susanne K. Kjaer<sup>3,4</sup>, Kirsten Frederiksen<sup>3</sup>, Charlotte G. Hannibal<sup>3</sup>, Tian-Li Wang<sup>1</sup>, Russell Vang<sup>1,2,\*</sup> and Ie-Ming Shih<sup>1,2,\*</sup>**<sup>1</sup>Department of Pathology, The Johns Hopkins University School of Medicine, Baltimore, MD, USA<sup>2</sup>Department of Obstetrics & Gynecology, The Johns Hopkins University School of Medicine, Baltimore, MD, USA<sup>3</sup>Unit of Virus, Lifestyle and Genes, Danish Cancer Society Research Center, Copenhagen, Denmark<sup>4</sup>Gynecologic Clinic, Juliane Marie Centre, Copenhagen University Hospital, Copenhagen, Denmark

\*These authors have contributed equally to this work

**Published:** June 22, 2021**Copyright:** © 2021 Chui et al. This is an open access article distributed under the terms of the [Creative Commons Attribution License](#) (CC BY 3.0), which permits unrestricted use, distribution, and reproduction in any medium, provided the original author and source are credited.

**This article has been corrected:** In Table 2, the numbers in column 2, rows 2 and 3, were accidentally switched. The corrected Table 2 is shown below. The authors declare that these corrections do not change the results or conclusions of this paper.

Original article: Oncotarget. 2019; 10:6870–6878. <https://doi.org/10.18632/oncotarget.27326>

**Table 2: Estimated risk of subsequent serous carcinoma by serous borderline tumor gene mutation**

| Gene mutation | Total number of women | Number of women with subsequent serous carcinoma | Estimated median time to progression <sup>†</sup> (years) | HR (95% CI) <sup>*</sup> | p-value |
|---------------|-----------------------|--------------------------------------------------|-----------------------------------------------------------|--------------------------|---------|
| Wildtype      | 54                    | 12                                               | 9.2                                                       | 1.00                     | -       |
| KRAS          | 95                    | 22                                               | 14.4                                                      | 1.00 (0.45 – 2.23)       | 0.99    |
| BRAF          | 52                    | 5                                                | 19.7                                                      | 0.27 (0.08 – 0.93)       | 0.038   |

<sup>†</sup>time to progression derived using the Aalen-Johansen estimator.

<sup>\*</sup>adjusted for age and stage (i.e. presence/absence of implants).
